## Review Article

# Enzymes as modular catalysts for redox half-reactions in H<sub>2</sub>-powered chemical synthesis: from biology to technology

Holly A. Reeve<sup>1</sup>, Philip A. Ash<sup>1</sup>, HyunSeo Park<sup>1</sup>, Ailun Huang<sup>1</sup>, Michalis Posidias<sup>1</sup>, Chloe Tomlinson<sup>1</sup>, Oliver Lenz<sup>2</sup> and Kylie A. Vincent<sup>1</sup>

<sup>1</sup>Department of Chemistry, Inorganic Chemistry Laboratory, University of Oxford, Oxford, OX1 3QR, U.K. and <sup>2</sup>Department of Chemistry, Technische Universität Berlin, Berlin 10623, Germany

Correspondence: Kylie A. Vincent (kylie.vincent@chem.ox.ac.uk)

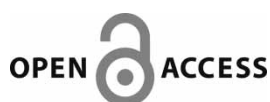

The present study considers the ways in which redox enzyme modules are coupled in living cells for linking reductive and oxidative half-reactions, and then reviews examples in which this concept can be exploited technologically in applications of coupled enzyme pairs. We discuss many examples in which enzymes are interfaced with electronically conductive particles to build up heterogeneous catalytic systems in an approach which could be termed *synthetic biochemistry*. We focus on reactions involving the H<sup>+</sup>/H<sub>2</sub> redox couple catalysed by NiFe hydrogenase moieties in conjunction with other biocatalysed reactions to assemble systems directed towards synthesis of specialised chemicals, chemical building blocks or bio-derived fuel molecules. We review our work in which this approach is applied in designing enzyme-modified particles for H<sub>2</sub>-driven recycling of the nicotinamide cofactor NADH to provide a clean cofactor source for applications of NADH-dependent enzymes in chemical synthesis, presenting a combination of published and new work on these systems. We also consider related photobiocatalytic approaches for light-driven production of chemicals or H<sub>2</sub> as a fuel. We emphasise the techniques available for understanding detailed catalytic properties of the enzymes responsible for individual redox half-reactions, and the importance of a fundamental understanding of the enzyme characteristics in enabling effective applications of redox biocatalysis.

## Introduction

Metalloenzyme moieties are combined, adapted and reused in Nature to build up the modular redox circuits that provide metabolic flexibility in microorganisms. We focus on the H<sup>+</sup>/H<sub>2</sub> cycling catalysed by hydrogenases and its combination with other biocatalysed redox half-reactions. Certain microorganisms are capable of using H<sub>2</sub> as a cellular energy source or of providing reducing equivalents to support a range of cellular redox processes, whereas others produce H<sub>2</sub> during fermentation [1]. Several types of hydrogenases have emerged during evolution, and here we are concerned with NiFe hydrogenase modules that incorporate a bimetallic nickel–iron active site [2]. The redox half-reaction is shown in eqn (1), together with the reduction potential calculated for pH 7, 25°C, 1 bar H<sub>2</sub>, but this potential shifts with H<sub>2</sub> partial pressure, pH and temperature according to the Nernst equation.

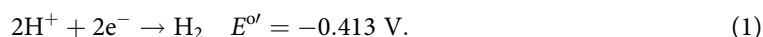

There are many examples of microbial metabolic processes that incorporate the H<sup>+</sup>/H<sub>2</sub> couple catalysed by NiFe hydrogenase moieties. Soluble, NAD(P)<sup>+</sup> [nicotinamide adenine dinucleotide (phosphate) oxidised]-reducing hydrogenases that link a NiFe hydrogenase module to a flavin-containing

Received: 30 September 2016

Revised: 11 November 2016

Accepted: 15 November 2016

Version of Record published:

6 January 2017

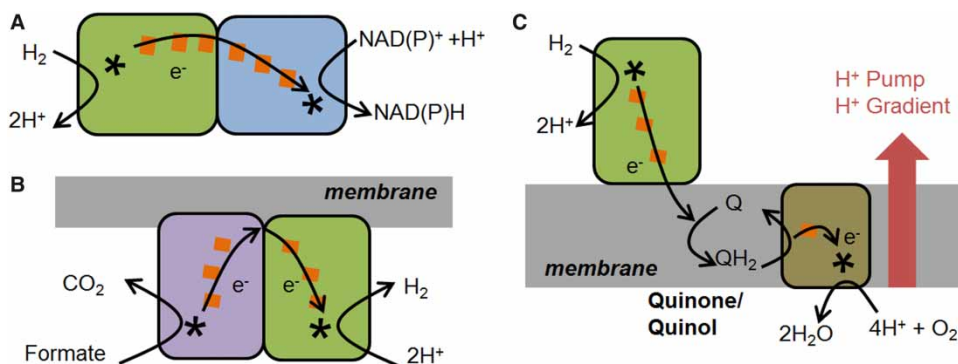

**Figure 1. Schematic representation of some of the biological functions of NiFe hydrogenases.**

(A) H<sub>2</sub> oxidation coupled to NAD(P)H generation by an NAD<sup>+</sup>-reducing soluble hydrogenase. (B) Formate oxidation coupled to H<sub>2</sub> generation by part of the formate hydrogen lyase complex. (C) H<sub>2</sub> oxidation by a membrane-bound hydrogenase coupled [via the quinone pool, Q/QH<sub>2</sub> (quinone/quinol)] to O<sub>2</sub> reduction and proton pumping across the inner membrane. Electron transfer relays are represented by orange squares (the number of squares does not necessarily reflect the number of naturally occurring redox centres), while catalytic sites are represented by asterisks, throughout.

NAD(P)<sup>+</sup>-reducing module are represented schematically in Figure 1A [3], and use H<sub>2</sub> to generate NAD(P)H [nicotinamide adenine dinucleotide (phosphate) reduced] for CO<sub>2</sub> fixation and biosynthesis of complex molecules. Formate hydrogen lyase (Figure 1B) links the reduction of H<sup>+</sup> to generate H<sub>2</sub> to the oxidation of formate to CO<sub>2</sub> [4,5]. The NiFe hydrogenase module is found again in multicomponent systems that link periplasmic H<sub>2</sub> oxidation to cytoplasmic O<sub>2</sub> reduction and transmembrane proton pumping (Figure 1C) [2] to the reduction of other substrates such as fumarate or nitrate.

The enzyme modules that are the subject of this review transfer electrons from a redox half-reaction catalysed at a buried active site (asterisks in Figure 1) to the protein surface via a relay chain of redox centres (orange squares in Figure 1) — usually iron–sulphur clusters or haem sites. This makes them ideal subjects for investigation by direct electrochemical methods, where the protein is immobilised on an electrode and electrons are exchanged via the relay chain between the electrode and the buried catalytic site (Figure 2A). This has given rise to the widely used approach known as protein film electrochemistry [6,7]. These redox enzymes rely on direct electron transfer steps and therefore contrast with the much larger subgroup of oxidoreductases that rely on biological hydride carriers such as NADH and catalyse hydrogenation and dehydrogenation reactions by hydride transfer. In some cases, the relevant enzyme moieties are isolated soluble units, whereas in other cases they are part of large electron-transferring complexes that may be associated with biological membranes. Using genetic engineering strategies, the enzyme modules of interest may be artificially dissociated from such complexes.

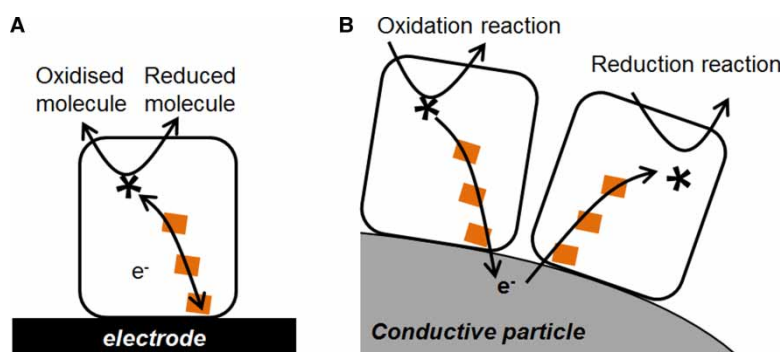

**Figure 2. Redox enzymes containing a relay chain of electron transfer centres are well suited to exchanging electrons directly with an electronically conductive surface.**

This allows these enzymes to be (A) studied on electrodes and (B) coupled artificially on electronically conductive particles.

In this review, we discuss how Nature's modular approach to redox catalysis can be extended further in a synthetic biochemistry approach in which enzyme redox pairs are electronically interlinked on conductive particles or surfaces. In particular, we focus on the use of H<sub>2</sub> gas as a clean source of electrons (energy) to drive enzyme-catalysed reductive half-reactions for the synthesis of chemical building blocks, specialised fine chemicals and bio-derived fuels. We show how the information gained from the electrochemical study of redox enzymes can be used to inform biotechnological applications in which enzyme moieties are assembled and linked on conductive surfaces (Figure 2B).

## Biological half-reactions studied by protein film electrochemistry

Protein film electrochemistry has emerged as an effective way to control, probe and exploit catalysis of redox half-reactions by enzymes. In this approach, enzyme molecules are immobilised on an electrode, such that they engage in direct electron exchange with the electrode. In the simplest procedures, the enzyme can be directly adsorbed onto a graphite (or other carbon material) electrode; in other cases, carbon or metal electrodes are modified with appropriate chemical monolayers to aid enzyme attachment [8,9]. The electrode effectively replaces physiological electron donors or acceptors, or the artificial redox agents used in solution assays, and the current measured at the electrode reflects the flow of electrons to/from the enzyme as it engages in catalysis of reduction or oxidation reactions. Rapid rotation of the electrode can provide efficient mass transport of substrate from a large volume of bulk solution to the small quantity of immobilised enzyme, as well as removing products, so protein film electrochemistry experiments can be carried out with negligible change in the substrate concentration experienced by the enzyme. This contrasts with conventional solution assays in which substrate becomes depleted in the bulk solution as the product builds up. The potential (voltage), which is set at the electrode, controls the thermodynamic driving force (redox conditions) experienced by the immobilised enzyme. One useful type of electrochemical experiment for investigating enzyme activity is cyclic voltammetry, in which the potential is swept back and forth between two potential limits to observe changes in enzyme activity with potential. For a redox enzyme that functions reversibly, catalysis in either the oxidative or reductive direction can be initiated by taking the electrode potential to more positive or more negative values, respectively.

These points are well established for NiFe hydrogenases, which have been studied extensively using electrochemical approaches at graphite electrodes, as represented schematically in Figure 3A [10,11]. Carbon materials are useful as electrodes for this work because they do not catalyse background H<sub>2</sub> oxidation or H<sup>+</sup> reduction in the potential range needed for studying the enzymes. NiFe hydrogenases have a relay chain of iron–sulphur clusters, and in the electrochemical experiment, these allow rapid electron transfer between the electrode and the NiFe catalytic site. The reversible response of *Escherichia coli* hydrogenase 2 (Hyd2) operating under 3% H<sub>2</sub> in N<sub>2</sub> is shown in Figure 3B [12]. At the most negative potentials, the enzyme is taking up electrons from the

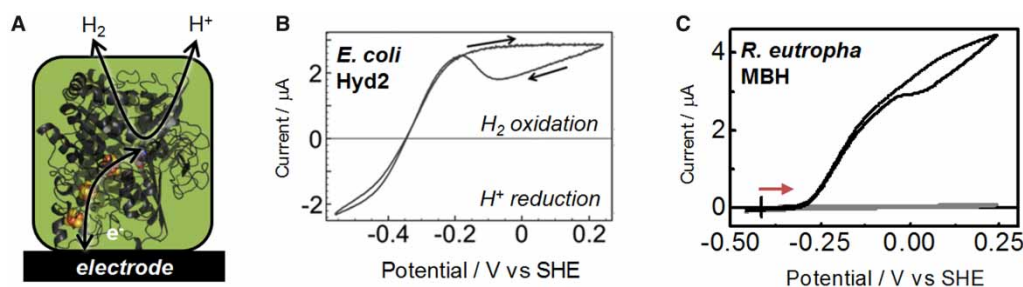

**Figure 3. Protein film electrochemistry has been insightful in studies of the H<sup>+</sup>/H<sub>2</sub> redox half-reaction catalysed by hydrogenases.**

(A) Schematic representation of a NiFe hydrogenase on an electrode. Cyclic voltammograms at a pyrolytic graphite 'edge' rotating disc electrode for: (B) *E. coli* hydrogenase 2 (Hyd 2, adapted with permission from Flanagan and Parkin [12]), recorded at pH 6, 3% H<sub>2</sub> and (C) *R. eutropha* MBH (black line), overlaid on the response for a bare electrode (grey line). Conditions for (C): pH 7.0, 0.1 M phosphate buffer, 100% H<sub>2</sub> with electrode rotation of 2400 rpm. The overpotential requirement of the enzyme is indicated by a red arrow, relative to the thermodynamic potential under these conditions (indicated by a vertical black line).

electrode (giving a negative current) to reduce protons from solution to make H<sub>2</sub>. At more positive potentials, the enzyme works in reverse, stripping electrons from H<sub>2</sub> to generate H<sup>+</sup> and a positive current at the electrode. As the potential is raised further, this enzyme undergoes an oxidative inactivation reaction which is reversed as the electrode is swept back to more negative potentials on the reverse scan. Importantly, the enzyme operates with no detectable overpotential requirement relative to  $E(\text{H}^+/\text{H}_2)$  at pH 6.0, 3% H<sub>2</sub> in N<sub>2</sub>, shown by the fact that the current crosses the zero line sharply. Figure 3C shows an example of a NiFe hydrogenase that is very poor at H<sup>+</sup> reduction under a H<sub>2</sub> atmosphere, and is strongly biased towards H<sub>2</sub> oxidation, the membrane-bound hydrogenase (MBH) from *Ralstonia eutropha*. This is likely to be related to the fact that H<sub>2</sub> oxidation in this enzyme requires a slight overpotential relative to  $E(\text{H}^+/\text{H}_2)$ : the onset of H<sub>2</sub> oxidation is ~0.1 V more positive than  $E(\text{H}^+/\text{H}_2)$  calculated for the conditions of this experiment. Separate protein film electrochemistry experiments on *R. eutropha* MBH have revealed that it is sufficiently O<sub>2</sub>-tolerant that it can continue oxidising H<sub>2</sub> in air [13,14].

More than 10 different isolated NiFe hydrogenases have been studied on carbon electrodes, revealing a range of catalytic properties [8,15–17]. For example, the NiFe hydrogenase I from the hyperthermophile *Aquifex aeolicus* is both O<sub>2</sub>-tolerant and stable at high temperatures [17], but like *R. eutropha* MBH is afflicted with a small overpotential requirement [15]. The robust hydrogenase I from *E. coli* (Hyd1) is O<sub>2</sub>-tolerant and also operates with a slight overpotential requirement, whereas the O<sub>2</sub>-sensitive Hyd2 from *E. coli* operates at no notable overpotential (Figure 3B) but is sensitive to O<sub>2</sub> [18]. The properties of hydrogenases as electrocatalysts have been altered further by site-directed amino acid exchanges [19,20]. Importantly, many NiFe hydrogenases are extremely active for H<sub>2</sub> oxidation with electrocatalytic turnover frequencies often estimated to exceed 1000 s<sup>-1</sup> [21,22]. The related NiFeSe hydrogenases, in which one of the cysteinyl sulphur atoms co-ordinating the active site is replaced by a selenium, are also promising candidates for applications, showing high activity and lower sensitivity to O<sub>2</sub> than some of the NiFe hydrogenases [23]. The set of characterised NiFe(Se) hydrogenases provides a useful library of bio(electro)catalysts for the H<sub>2</sub> oxidation half-reaction under different conditions for the applications discussed below. Many FeFe hydrogenases have also been characterised electrochemically and many are highly active electrocatalysts, particularly in the H<sub>2</sub> production direction, but they tend to be more difficult to handle owing to their greater sensitivity to O<sub>2</sub> [24–26].

Protein film electrochemistry has been equally instructive in studies of other enzyme-catalysed redox half-reactions. A selection of examples is shown in Figure 4. Figure 4A shows a cyclic voltammogram revealing nitrate reduction to nitrite by the NarGHI subcomplex of *E. coli* nitrate reductase [27]. Figure 4B shows reversible cycling of formate and CO<sub>2</sub> by a Mo-containing formate dehydrogenase moiety, a reaction which holds promise for fixation of CO<sub>2</sub> to generate fuels or useful chemical building blocks [28]. Figure 4C shows NAD<sup>+</sup> reduction/NADH oxidation by the NAD<sup>+</sup>-reducing moiety of *R. eutropha* soluble hydrogenase (blue in Figure 1A), which has been separated from the hydrogenase moiety by protein engineering [29]. The ability of

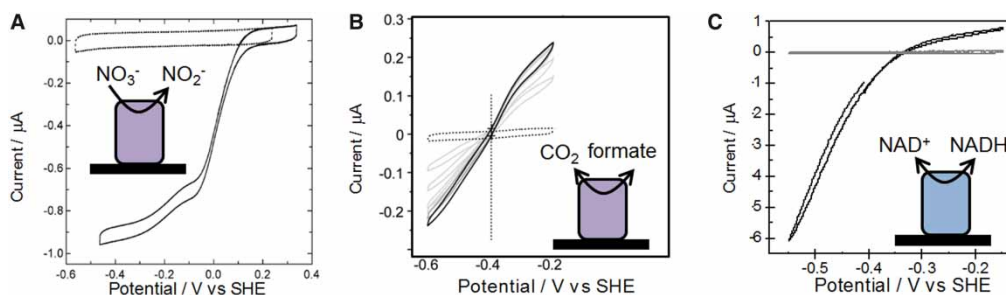

**Figure 4. Protein film electrochemistry used to probe enzyme-catalysed redox half-reactions.**

(A) Work from Elliott et al. demonstrating nitrate reduction by the NarGHI subcomplex of *E. coli* nitrate reductase in the presence of 1 mM NO<sub>3</sub><sup>-</sup> at pH 7, 30°C, adapted with permission from ref. [27]. Copyright 2014 American Chemical Society.

(B) Data from Bassegoda et al. showing reversible interconversion of CO<sub>2</sub> and formate by *E. coli* Mo-containing formate dehydrogenase in the presence of 1 mM CO<sub>2</sub> and 1 mM formate at pH 6.8, 23°C (dark scan recorded first; subsequent scans showing evidence of enzyme desorption are shown in grey) adapted with permission from ref. [28].

(C) Work from Lauterbach et al. showing reversible NAD<sup>+</sup>/NADH cycling by the NAD<sup>+</sup>-reducing HoxFU moiety of *R. eutropha* soluble hydrogenase in the presence of 1 mM NAD<sup>+</sup> and 1 mM NADH at pH 8, 30°C, adapted with permission from ref. [29].

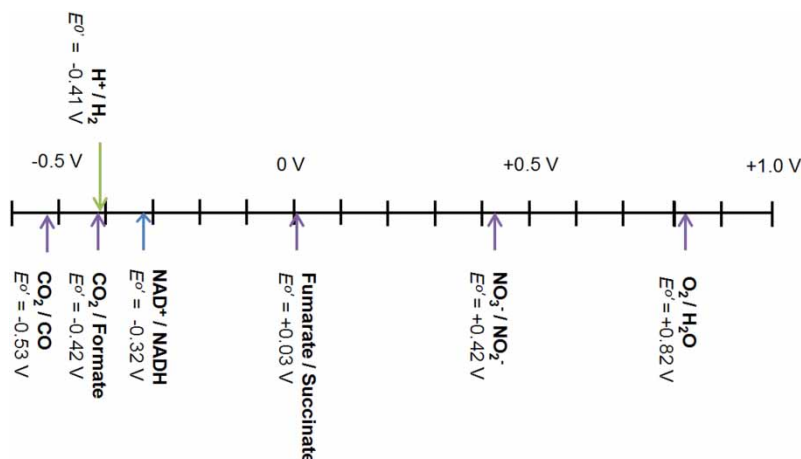

**Figure 5.** The thermodynamic context for coupling biological half reactions. Thermodynamic potentials for relevant biological couples at pH 7.

certain immobilised enzyme moieties to carry out the  $\text{NAD}^+/\text{NADH}$  reaction with no detectable overpotential [29,30] is particularly significant from a catalytic perspective since electrocatalytic NADH oxidation or  $\text{NAD}^+$  reduction is difficult to achieve with standard electrodes without large overpotential requirements [31,32].

Other examples of redox enzymes functioning well in direct electron transfer at electrodes include carbon monoxide dehydrogenase (CODH) for reversible interconversion of CO and  $\text{CO}_2$  [33], fumarate reductase for interconversion of fumarate and succinate [34], cellobiose dehydrogenase for oxidation of substrates such as lactate [35], fructose dehydrogenase for oxidation of fructose [36,37] and laccase or bilirubin oxidase for  $\text{O}_2$  reduction [38–40].

The potentials of a range of biologically relevant redox half-reactions are shown in Figure 5. The potentials of the  $\text{H}^+/\text{H}_2$  and  $\text{O}_2/\text{H}_2\text{O}$  couples are  $-0.413$  and  $+0.816$  V under standard conditions but corrected for pH 7. This large and favourable gap in potential ( $\Delta E = 1.23$  V) is exploited by organisms, such as *R. eutropha*, for energy generation from  $\text{H}_2$  as shown schematically in Figure 1C. With this significant energetic driving force, a moderate overpotential requirement in the enzymes for  $\text{H}_2$  oxidation or  $\text{O}_2$  reduction is not problematic. However, other biological systems rely on linking redox half-reactions which are much more closely spaced in potential. An example is the soluble hydrogenase shown in Figure 1A, which couples  $\text{H}_2$  oxidation to  $\text{NAD}^+$  reduction. The  $\Delta E$  for the  $\text{H}^+/\text{H}_2$  and  $\text{NAD}^+/\text{NADH}$  redox couples at pH 7.0 is just 0.11 V; therefore, any overpotential requirement for either  $\text{NAD}^+$  reduction or  $\text{H}_2$  oxidation would significantly affect the success of coupling these two half-reactions. In accordance with this, both the hydrogenase moiety and the  $\text{NAD}^+$ -reductase moiety (Figure 4C) of this enzyme have been shown to work reversibly without detectable overpotential requirement [29,41].

The following sections discuss methods for artificially coupling enzyme-catalysed half-reactions, with an emphasis on application to  $\text{H}_2$ -driven chemical synthesis.

## Coupled redox catalysis on carbon particles

The observation that enzyme-modified graphite electrodes are efficient electrocatalysts for a wide range of redox half-reactions inspired Armstrong and co-workers to bring together two enzyme-catalysed half-reactions on graphite platelet particles. The graphite particle serves as a sink for electrons from the oxidation half-reaction, and a donor to the enzyme catalysing a reduction reaction, and thus can be considered as a ‘wire’ for connecting the two redox enzyme moieties (Figure 2B). This was demonstrated for particles modified with both a NiFe hydrogenase (from *Allochrochromatium vinosum*) and the *E. coli* nitrate reductase moiety from Figure 4A, which are shown schematically in Figure 6A [42]. Nitrite was detected using the colorimetric Griess reagent assay when particles modified with these two enzymes were immersed in a buffered solution containing sodium nitrate and flushed with  $\text{H}_2$  (Figure 6B). No nitrite was detected in the absence of particles, confirming that electron transfer must occur via the graphite. A second example from this proof-of-concept study showed that fumarate reduction to succinate by fumarate reductase (*E. coli* FrdAB) can be coupled to  $\text{H}_2$  oxidation by



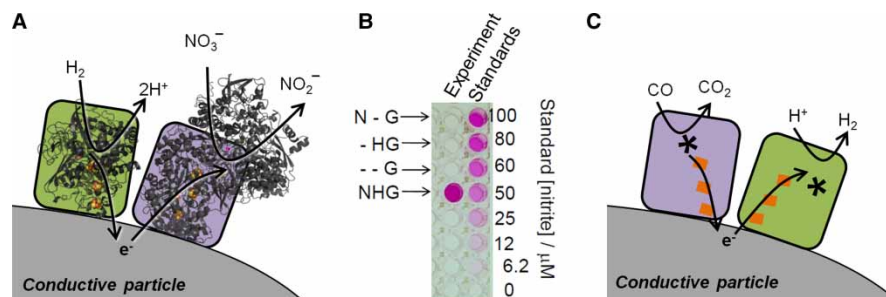

**Figure 6. The concept of coupled enzyme redox catalysis on electronically conductive graphite platelet particles.**

(A) Schematic representation of hydrogenase and nitrate reductase co-immobilised on graphite particles. (B) Results from a Griess reagent assay showing that H<sub>2</sub>-driven reduction of nitrate to nitrite by enzyme-modified particles (NHG) occurs only when nitrate reductase (N) and hydrogenase (H) are co-adsorbed on the graphite particles (G), but not in the absence (–) of any of these components. Panel (B) is reproduced from work by Vincent et al. with permission from ref. [42]. (C) Schematic representation of hydrogenase and carbon monoxide dehydrogenase co-immobilised on carbon particles for catalysis of the water-gas shift reaction.

a co-immobilised hydrogenase. Although nitrate and fumarate reduction reactions are not obviously important in chemical synthesis, this work demonstrates a powerful modular concept for artificially coupling selective biocatalysis of redox half-reactions [42]. The authors estimated an enzyme loading of ~1600 enzyme molecules per platelet particle [42], and presumably, the hydrogenase and reductase enzyme will be randomly mixed on the surface.

Armstrong and co-workers went on to exploit graphite platelets modified with hydrogenase and CODH as a heterogeneous catalyst for the water-gas shift reaction, in which CO and water combine to release H<sub>2</sub> and CO<sub>2</sub>; here, the hydrogenase operates in reverse to reduce H<sup>+</sup> to H<sub>2</sub> (Figure 6C) [43].

## Modular H<sub>2</sub>-driven NADH generation

We have demonstrated a related approach for coupling H<sub>2</sub> oxidation to NADH generation on carbon particles, shown schematically in Figure 7A [44,45]. The observation that the NAD<sup>+</sup>-reducing moiety of *R. eutropha* soluble hydrogenase on a graphite electrode is an efficient electrocatalyst for NAD<sup>+</sup> reduction and NADH oxidation (see Figure 4C) inspired us to combine this NAD<sup>+</sup>-reductase with a robust hydrogenase on carbon

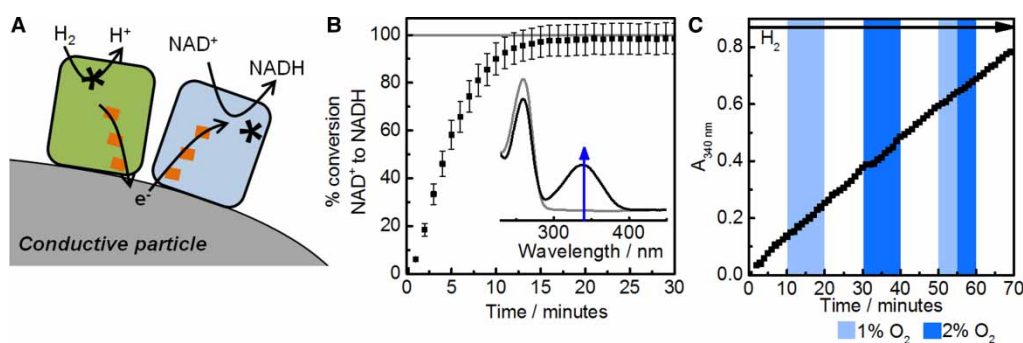

**Figure 7. Oxidation of H<sub>2</sub> coupled to NAD<sup>+</sup> reduction on carbon particles to yield NADH.**

(A) Schematic representation of enzyme-modified particles for H<sub>2</sub>-driven NADH generation. (B) Conversion of NAD<sup>+</sup> to NADH by carbon black [Black Pearls (BP) 2000] particles modified with *E. coli* Hyd2 [18] and the NAD<sup>+</sup>-reducing moiety (HoxH<sup>I64A</sup>YFU) of *R. eutropha* soluble hydrogenase with the hydrogenase portion inactivated by an I64A exchange in the hydrogenase large subunit (prepared according to established protocols) [46] operating in a H<sub>2</sub>-saturated solution containing NAD<sup>+</sup> (70 μM) at pH 8.0. Figure reproduced with permission from ref. [45] by Reeve et al. (C) H<sub>2</sub>-driven NADH generation using enzyme-modified particles in the presence of H<sub>2</sub>:O<sub>2</sub> mixtures. This experiment used *E. coli* Hyd1 and the same NAD<sup>+</sup>-reducing enzyme moiety immobilised on carbon black in a starting solution of NAD<sup>+</sup> (1 mM); the gas mixture in the experiment headspace was precisely controlled and changed throughout the experiment using mass flow controllers; H<sub>2</sub> was present throughout.

surfaces to assemble an alternative heterogeneous catalyst system for  $\text{NAD}^+$  reduction to  $\text{NADH}$ . Near-complete conversion of  $\text{NAD}^+$  to  $\text{NADH}$  can be achieved using this system with a hydrogenase that operates close to the thermodynamic potential for  $\text{H}_2$  oxidation (i.e. with no overpotential requirement) such as *E. coli* Hyd2 or *Desulfovibrio vulgaris* Miyazaki F hydrogenase. Figure 7B shows the percentage of conversion of  $\text{NAD}^+$  to  $\text{NADH}$  during a reaction course under a  $\text{H}_2$  atmosphere measured by the increase in absorbance at 340 nm as the cofactor becomes reduced. These catalytic enzyme-modified particles were shown to operate at  $\text{H}_2$  partial pressures as low as 0.02 bar, and can be separated from the reaction solution and reused over multiple reaction cycles [45]. No  $\text{NADH}$  is detected from a reaction mixture involving the two enzymes but no carbon particles, showing again that the carbon is essential in providing electronic coupling between the enzymes.

Having enzymes ‘plugged in’ to conductive particles allows a very modular approach to coupling redox half-reactions. Drawing on the library of available isolated NiFe hydrogenases with different properties, we then selected an  $\text{O}_2$ -tolerant hydrogenase, *E. coli* Hyd1, to demonstrate  $\text{NADH}$  generation under  $\text{H}_2$  in the presence of 1–2%  $\text{O}_2$ . As shown in Figure 7C, this level of  $\text{O}_2$  does not have a significant effect on the rate of  $\text{NADH}$  generation, as indicated by the fairly linear slope for change in absorbance at 340 nm with time.

The reduction potentials for the  $\text{H}^+/\text{H}_2$  and  $\text{NAD}^+/\text{NADH}$  couples are close together (see Figure 5), meaning that subtle changes in solution conditions can reverse the thermodynamically favourable direction of reaction. This is illustrated in Figure 8A, which shows how the  $\text{H}^+/\text{H}_2$  couple potential varies with  $\text{H}_2$  partial pressure ( $p\text{H}_2$ ) and the  $\text{NAD}^+/\text{NADH}$  couple potential varies with the ratio of  $\text{NAD}^+:\text{NADH}$ . At high levels of  $\text{H}_2$  and a high ratio of  $\text{NAD}^+/\text{NADH}$  (lower portion of Figure 8A), the reduction of  $\text{NAD}^+$  by  $\text{H}_2$  is favoured. However, when both the  $\text{H}_2$  partial pressure and the  $\text{NAD}^+/\text{NADH}$  ratio are low (upper shaded portion of Figure 8A), the reaction will occur in reverse. Enzyme-modified carbon particles operating in the  $\text{H}^+$  reduction direction are shown schematically in Figure 8B. For this work, two enzymes that clearly exhibit bidirectional behaviour in electrochemical experiments were chosen: Hyd2 from *E. coli* (see Figure 3B) and the  $\text{NAD}^+$ -reducing moiety from *R. eutropha* soluble hydrogenase (see Figure 4C). Results for  $\text{NAD}^+$  generation from a solution containing  $\text{NADH}$  under a  $\text{N}_2$  atmosphere are shown in Figure 8C.

There has also been interest in metal-catalysed or combined metal/enzyme systems for  $\text{H}_2$ -driven  $\text{NADH}$  recycling. Wang and Yiu [47] tested Pt on an  $\text{Al}_2\text{O}_3$  support for  $\text{H}_2$ -driven  $\text{NADH}$  generation. Depending on the reaction conditions, various incorrect forms of the cofactor were formed using this catalyst, but some successful  $\text{NADH}$  recycling was achieved. Reeve et al. [44] explored a composite catalyst, shown schematically in Figure 9 comprising electrochemically platinised pyrolytic graphite platelets with immobilised  $\text{NAD}^+$ -reducing enzyme moiety (HoxFU from *R. eutropha*), or  $\text{NAD}^+$ -reducing HoxH<sup>I64A</sup>YFU (I64A exchange in the subunit, HoxH) of *R. eutropha* immobilised on HiSPEC 3000 carbon black powder with 20% Pt loading. In both cases, the presence of the  $\text{NAD}^+$ -reducing enzyme gave rise to a significantly faster rate of  $\text{NADH}$  generation compared with the respective carbon-supported platinum catalyst alone. For the  $\text{NAD}^+$ -reducing enzyme on HiSPEC 3000 carbon black with 20% Pt, 92% conversion of  $\text{NAD}^+$  to  $\text{NADH}$  was achieved, although possible impurities in the  $\text{NADH}$  due to the presence of the Pt were not analysed. Besides concerns over formation of

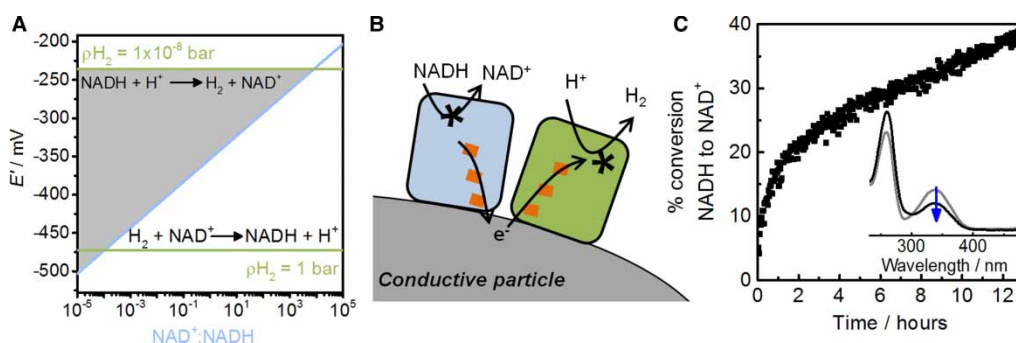

**Figure 8. Oxidation of  $\text{NADH}$  to  $\text{NAD}^+$  coupled to  $\text{H}_2$  generation on carbon particles.**

(A) Thermodynamics for  $\text{H}_2 + \text{NAD}^+ \leftrightarrow \text{H}^+ + \text{NADH}$  at high and low  $\text{H}_2$  partial pressures ( $p\text{H}_2$ ) and a range of  $\text{NAD}^+:\text{NADH}$  ratios.

(B) Schematic representation of enzyme-modified particles for  $\text{NADH}$  oxidation and  $\text{H}_2$  production. (C) Conversion of  $\text{NADH}$  to

$\text{NAD}^+$  using  $\text{H}^+$  reduction as the electron sink at carbon black particles modified with *E. coli* Hyd2 [18] and the  $\text{NAD}^+$ -reducing HoxH<sup>I64A</sup>YFU of *R. eutropha* in the presence of  $\text{NADH}$  (1 mM) at pH 8, 30°C.

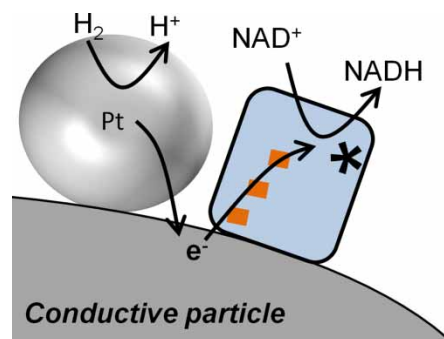

**Figure 9.** A composite chemo-/bio- approach to heterogeneous catalysis of H<sub>2</sub>-driven NADH generation. This approach involves co-immobilised Pt nanoparticles for H<sub>2</sub> oxidation and an NAD<sup>+</sup>-reducing enzyme moiety for NAD<sup>+</sup> reduction.

bio-inactive cofactor derivatives in the presence of precious metals, these systems have the disadvantage of requiring an expensive and potentially toxic metal catalyst.

The examples presented so far demonstrate possibilities for turning redox enzyme pairs into selective heterogeneous catalysts which can be handled easily, and separated from solution and reused. In the following section, we present experiments that explore further the flow of electrons between redox enzymes linked on carbon particles, focusing again on hydrogenase paired with an NAD<sup>+</sup>-reducing moiety.

## Probing the electronic communication between co-immobilised hydrogenase and NAD<sup>+</sup>-reductase

NiFe hydrogenases are fairly well characterised spectroscopically, and in particular, infrared (IR) spectroscopy has been useful in understanding states of the active site. The Fe atom of the active site of NiFe hydrogenases has native CO and CN<sup>-</sup> ligands which give rise to clearly distinguishable absorption bands in the IR spectrum, and the wavenumber positions of these bands vary according to the redox level of the active site. IR experiments have been performed under electrochemical control on many NiFe hydrogenases, so the redox levels of the active site present at different applied potentials are well documented [48–50]. The wavenumber positions of the CO stretching vibrational bands,  $\nu_{\text{CO}}$ , for some of the inactive and active states of the catalytic site of *E. coli* Hyd1 are indicated in Figure 10A. Here, we make use of this information as a guide to follow the redox state of hydrogenase (*E. coli* Hyd1) in response to coupled catalysis with an NAD<sup>+</sup>-reducing moiety from *R. eutropha*.

To confirm that the hydrogenase responds to electron transfer from the coupled NAD<sup>+</sup>-reducing enzyme moiety, we initially carried out experiments with carbon particles modified with a mixture of the hydrogenase and the NAD<sup>+</sup>-reducing moiety in an attenuated total reflectance (ATR) IR mode, as shown schematically in Figure 10B. Particles were deposited on a silicon internal reflection element, such that the ATR IR cell solution could be exchanged easily [49]. This allows direct comparison of the coupled enzyme system under a range of conditions, as shown by the spectra in Figure 10C. Hyd1 seems to be isolated mainly in the catalytically inactive state known as Ni-B, and this is reflected in the spectrum of the as-prepared particles (top spectrum, labelled ‘N-saturated buffer’). The hydrogenase was then activated using H<sub>2</sub> (labelled ‘H-saturated buffer’), giving rise to peaks corresponding to reduced, catalytically active states of the active site, predominantly Ni-R and Ni-L. The solution was then exchanged for N<sub>2</sub>-saturated solution containing 1 mM NADH (labelled ‘1 mM NADH’). Introduction of the reduced cofactor had no further effect on the hydrogenase redox level. The solution was then exchanged for a series of N<sub>2</sub>-saturated solutions containing increasingly higher ratios of NAD<sup>+</sup>/NADH. Raising the proportion of the oxidised cofactor NAD<sup>+</sup> in solution gave rise to increasingly oxidised levels of the hydrogenase active site (enriched in Ni-SI and Ni-B), until at 1 mM NAD<sup>+</sup> (labelled ‘1 mM NAD<sup>+</sup>’) when the hydrogenase reverted entirely to the oxidised inactive state, Ni-B. Clearly, making the solution NAD<sup>+</sup>/NADH pool increasingly oxidised by raising the proportion of NAD<sup>+</sup> leads to electron flow out of the hydrogenase towards the NAD<sup>+</sup>-reducing enzyme moiety, causing the hydrogenase to become increasingly oxidised. In a control experiment in which hydrogenase-modified particles were set up in the ATR IR cell in the absence of NAD<sup>+</sup>-reducing enzyme moiety, no changes were observed in the  $\nu_{\text{CO}}$  bands of the hydrogenase active site in response to variation in NAD<sup>+</sup> or NADH in solution.



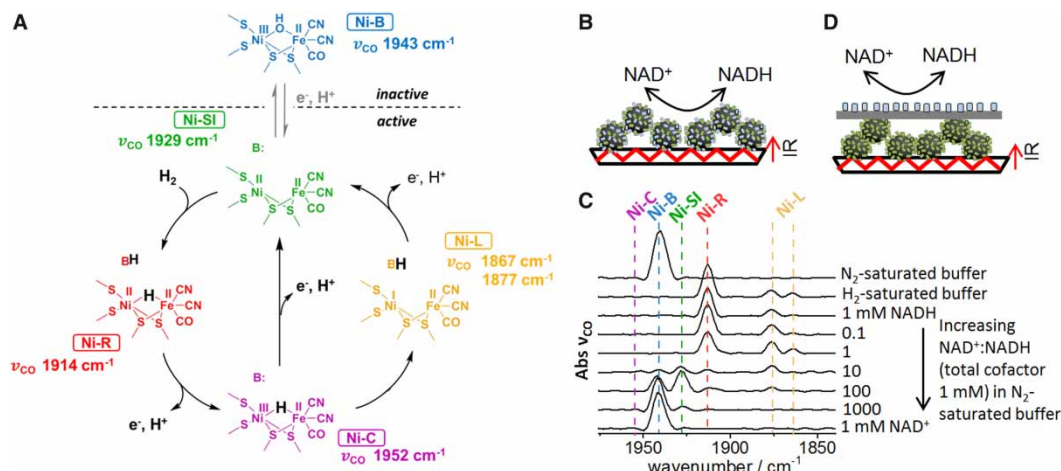

**Figure 10. Attenuated ATR IR spectroscopy used to probe the electronic connection between the hydrogenase and  $\text{NAD}^+$ -reducing enzyme moiety on carbon particles.**

(A) Main inactive and active states of the catalytic site of *E. coli* Hyd1, together with the  $\nu_{\text{CO}}$  wavenumber positions observed for each state. B: indicates basic site(s) that accept protons during catalysis, which could include co-ordinated cysteine sulphur atoms, and other surrounding amino acid residues. (B) Schematic representation of the experimental set-up for testing particles modified with a mixture of hydrogenase and  $\text{NAD}^+$ -reducing moiety. (C) Set of ATR IR spectra recorded during solution exchange experiments. The cell solution contained 50 mM Tris–HCl (pH 8.0), and the  $\text{H}_2/\text{N}_2$  and  $\text{NAD}^+/\text{NADH}$  concentrations were varied as indicated on the figure. (D) Schematic representation of the experimental set-up for testing the immobilised enzymes physically separated by a piece of carbon paper (Toray TGP-H-030), in response to changes in solution  $\text{H}_2/\text{N}_2$  or  $\text{NAD}^+/\text{NADH}$  ratio. For these experiments, the hydrogenase was *E. coli* Hyd1 [18], and the  $\text{NAD}^+$ -reducing moiety was HoxH<sup>I64A</sup>YFU of *R. eutropha* soluble hydrogenase, with the hydrogenase portion inactivated by an I64A exchange in the HoxH subunit (prepared according to established protocols) [46]. Carbon particles were BP2000 carbon black.

To translate biocatalytic systems into viable technologies, it is essential to fully understand the activation, inactivation and inhibition processes occurring in the enzyme components, such that robust handling and operating protocols can be developed. The ATR IR method allows *in operando* study of an enzyme heterogeneous catalyst system, providing insights into the processes occurring under different substrate (or other) conditions. For example, the spectra in Figure 10C show that the addition of 1 mM  $\text{NAD}^+$  under  $\text{N}_2$  is sufficient to completely oxidise the hydrogenase to its catalytically inactive Ni-B state, from which reactivation with either  $\text{NADH}$  or  $\text{H}_2$  would be required, and thus are informative as to conditions which can lead to inactivation of the enzymes.

A separate set of experiments was conducted on particles modified with hydrogenase, physically separated by a sheet of electronically conductive carbon paper from the  $\text{NAD}^+$ -reducing moiety, which was immobilised on a second sheet of carbon paper, as shown schematically in Figure 10D. These gave similar spectral changes in response to varying the relative concentrations of  $\text{NAD}^+$  and  $\text{NADH}$ , confirming that the changes in the hydrogenase redox state with  $\text{NAD}^+/\text{NADH}$  ratio must be due to electron flow between the two enzymes via the conductive carbon, and that electron transfer does require direct interaction between the two enzymes.

In this work, only the active site of the hydrogenase was monitored; however, it is also possible to follow the redox state of the flavin site of an electrode-immobilised flavoenzyme using IR spectroscopy, and it should therefore be possible to monitor electron flow between the NiFe hydrogenase site and the flavin site of the  $\text{NAD}^+$ -reductase simultaneously [51,52].

## Using $\text{H}_2$ -driven $\text{NADH}$ recycling to support dehydrogenase catalysis for applications in fine chemical synthesis

There is growing interest in harnessing the selectivity of  $\text{NADH}$ -dependent redox enzymes *in vitro* for fine chemical synthesis particularly for hydrogenation and dehydrogenation reactions.  $\text{NAD(P)H}$  cofactors also provide the reducing equivalents necessary for reduction of  $\text{O}_2$  by cytochrome P450 monooxygenases, which

insert an O atom into a CH bond. Although enzyme catalysts are highly attractive for these reactions in terms of their regio- and stereo-selectivity, difficulties in recycling the expensive reduced cofactors have been impediments to widespread application. One established method for regeneration of NADH uses formate dehydrogenase to couple reduction of the oxidised cofactor, NAD<sup>+</sup> to the oxidation of formate, but the slow turnover frequency of this enzyme and complications of solution acidification by the product, CO<sub>2</sub>, make this system unattractive. Alternative cofactor recycling systems include alcohol dehydrogenase-catalysed NAD(P)<sup>+</sup> reduction coupled to isopropanol oxidation to acetone, or glucose dehydrogenase-mediated NAD(P)<sup>+</sup> reduction linked to the oxidation of glucose to gluconolactone. These approaches to regenerating the hydride carriers have poor atom efficiency and thus generate unwanted byproducts. This has an impact on the economic and environmental viability of such enzyme cascade reactions.

The possibility of exploiting soluble NAD(P)<sup>+</sup>-reducing hydrogenases for H<sub>2</sub>-driven recycling of reduced nicotinamide cofactors has not escaped notice due to the perfect atom economy offered by hydrogenations using H<sub>2</sub> as the reductant. Payen et al., for instance, reported in 1983 that the NAD<sup>+</sup>-reducing soluble hydrogenase from *R. eutropha* (formerly *Alcaligenes eutrophus*) co-immobilised on corn stover particles with L-lactate dehydrogenase functions in sustained pyruvate reduction with a total turnover number (TTN) of 111 product per NADH over 45 h, although activity dropped significantly after ~15 h [53]. An NADP<sup>+</sup>-reducing hydrogenase from *Pyrococcus furiosus* has been demonstrated for ketone reduction reactions [54]. Ratzka et al. [55] demonstrated an impressive TTN of 143 000 for the NAD<sup>+</sup>-reducing hydrogenase during NADH supply to a carbonyl reductase (alcohol dehydrogenase, ADH) for acetophenone reduction using the NAD<sup>+</sup>-reducing soluble hydrogenase from *R. eutropha* H16, despite limited stability of the enzyme (half-life, *t*<sub>1/2</sub>, ~5 h). Stability of the soluble, NAD(P)<sup>+</sup>-reducing hydrogenases has remained a barrier to their exploitation in biotechnology.

We have shown that the carbon particles modified with hydrogenase and the NAD<sup>+</sup>-reducing enzyme moiety described above can be extended to H<sub>2</sub>-driven NADH supply for NADH-dependent enzymes, as shown schematically in Figure 11A. We have reported this for H<sub>2</sub>-dependent reduction of pyruvate to lactate using lactate dehydrogenase [44] and acetophenone to phenylethanol using an ADH [45]. The use of H<sub>2</sub> as the reducing equivalent with the heterogeneous enzyme catalyst system means that no byproducts are generated from the cofactor recycling and guarantees highly pure chemical products. Under atmospheric H<sub>2</sub> pressures, >98% conversion of acetophenone to phenylethanol is achieved, as shown in Figure 11B. When using the ADH co-immobilised in close proximity to the cofactor recycling enzymes, the reaction was shown to proceed approximately twice as fast as when the ADH was used in solution under otherwise identical conditions (Figure 11C). Low cofactor concentrations (down to 10 μM) can be used; this is low enough that the cofactor does not necessarily need to be removed from the final product as it can be present at <0.1 mol%. The enzymes and the cofactor operate with high stability: each cofactor can be used at least 600 times (TN > 600) and each NAD<sup>+</sup> reductase can be used more than 150 000 times (TTN > 150 000) [45]. Using either an (R)- or (S)-selective ADH (ADH 101 or 105 from Johnson Matthey Catalysis and Chiral Technologies), either enantiomer of phenylethanol can be generated with >99% enantiomeric excess (ee) as shown in the HPLC traces in Figure 11D.

## Related photocatalytic approaches

A related body of research has demonstrated the use of redox enzymes interfaced with semiconductor or quantum dot particles for light-driven catalysis of specific reductive redox half-reactions, supported by the oxidation of a sacrificial reductant in solution such as triethanolamine (TEOA), 2-(*N*-morpholino)ethanesulfonic acid buffer or ascorbic acid (AA). Illumination excites electron transfer from sites in the particle into the enzyme, initiating reductive catalysis in the enzyme, and electron vacancies (h<sup>+</sup>) in the particle are refilled by donation from the sacrificial donor. This concept has been of significant interest for clean light-driven production of H<sub>2</sub> as a fuel from water. This has been demonstrated with a NiFeSe hydrogenase on Ru dye-sensitised TiO<sub>2</sub> particles (Figure 12A) [56], with the NiFeSe hydrogenase selected for this work, out of the library of available isolated NiFe and NiFeSe hydrogenases, because it adsorbed well on the TiO<sub>2</sub>, showed a high turnover frequency (TOF) for H<sup>+</sup> reduction with minimal product inhibition by H<sub>2</sub> and had good tolerance to O<sub>2</sub>. Photocatalytic H<sub>2</sub> production has also been demonstrated by FeFe hydrogenases on CdTe nanocrystals [57] or CdS nanorods [58]. Again, the photocatalytic reaction concept is modular, and other biocatalysed reductive half-reactions have been demonstrated on semiconductor or quantum dot particles, including reduction of CO<sub>2</sub>

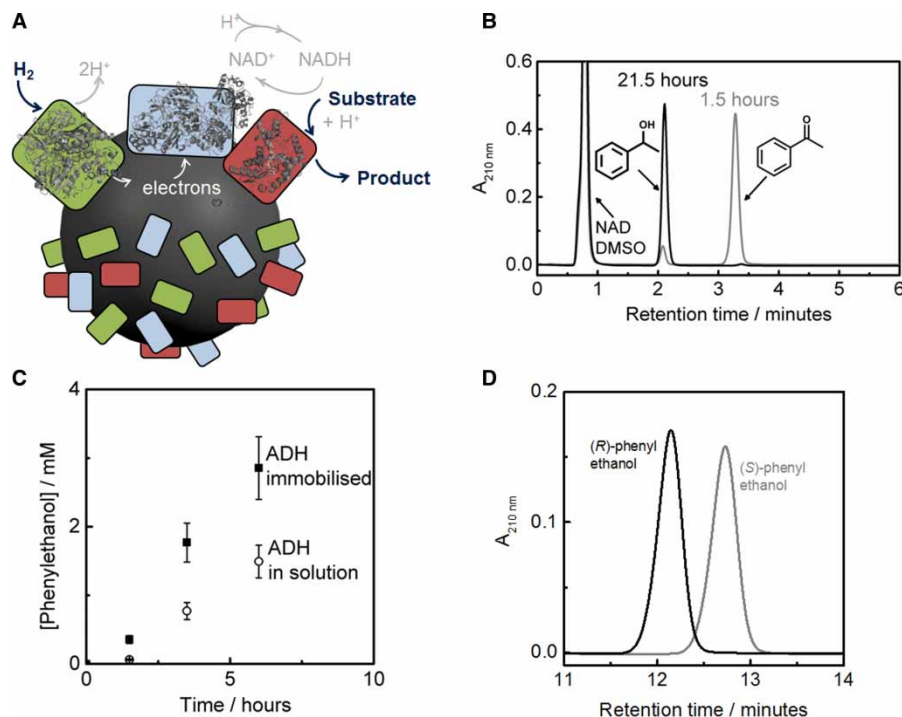

**Figure 11. Enzyme-modified particles for highly selective H<sub>2</sub>-driven ketone reduction at 1 bar H<sub>2</sub>.**

(A) Schematic representation of the particle system. (B) HPLC traces after 1.5 and 21 h of H<sub>2</sub>-driven ketone reduction. (C) The generation of phenylethanol using ADH co-immobilised on particles or in solution. Panels (B) and (C) are reproduced from ref. [45] by Reeve et al. (D) HPLC traces showing generation of (R)- or (S)-1-phenylethanol with >99% ee when co-immobilising different alcohol dehydrogenases; black = (R)-selective ADH 101 and grey = (S)-selective ADH 105, both provided by Johnson Matthey Catalysis and Chiral Technologies. All experiments made use of *E. coli* Hyd2 [18] and the NAD<sup>+</sup>-reducing moiety was HoxH<sup>I64A</sup>YFU of *R. eutropha* soluble hydrogenase, with the hydrogenase portion inactivated by an I64A exchange in the HoxH subunit (prepared according to established protocols) [46] immobilised on carbon black (BP2000). Reaction conditions: 10 mM acetophenone, 1 mM NAD<sup>+</sup>, Tris-HCl buffer (pH 8), 25°C, 2% DMSO.

to CO by CODH on Ru dye-sensitised TiO<sub>2</sub> particles [59,60] and reduction of N<sub>2</sub> to ammonia in a system involving the nitrogenase MoFe protein on CdS nanorods [61].

The desirability of clean production of H<sub>2</sub> as a fuel from water has spurred the development of alternative photocatalytic approaches that link the light-harvesting photosystem I protein to either FeFe hydrogenases as shown schematically in Figure 12B [62–64], or to NiFe hydrogenases [58]. The Golbeck group have developed a strategy for linking the outer iron–sulphur clusters on hydrogenase and photosystem I via dithiolate linkers (short enough to allow electron tunnelling), which replace one of the cysteinyl ligands to each cluster as shown by the red linker in Figure 12B [62,64], whereas Lenz and co-workers have created fusion proteins of NiFe hydrogenase and an electron transfer unit of photosystem I by genetic engineering [65–67].

To avoid the requirement for the addition of sacrificial organic molecules as reductants for photobiocatalytic reductions, the ideal electron donor would be water (oxidised to O<sub>2</sub>), but this requires an effective catalyst for the water oxidation reaction, in addition to the light energy required to overcome the unfavourable thermodynamics (for example, ΔE for coupling H<sup>+</sup> reduction to generate H<sub>2</sub> with H<sub>2</sub>O oxidation to O<sub>2</sub> at pH 7 is –1.23 V). An example of this concept is provided by the work of Mersch et al., represented schematically in Figure 12C, in which an indium tin oxide (ITO) surface modified with NiFeSe hydrogenase is electronically connected to another ITO surface modified with water-oxidising photosystem II [68].

Photobiocatalytic approaches have also been developed in the area of cofactor-dependent chemical synthesis. Brown et al. [70] have demonstrated a system for reduction of NADP<sup>+</sup> to NADPH for supply to a NADPH-dependent ADH using a ferredoxin NADP<sup>+</sup>-reductase on a CdSe quantum dot with a high excess of ascorbic acid as a sacrificial electron donor (Figure 13). Although this holds promise as an alternative route to

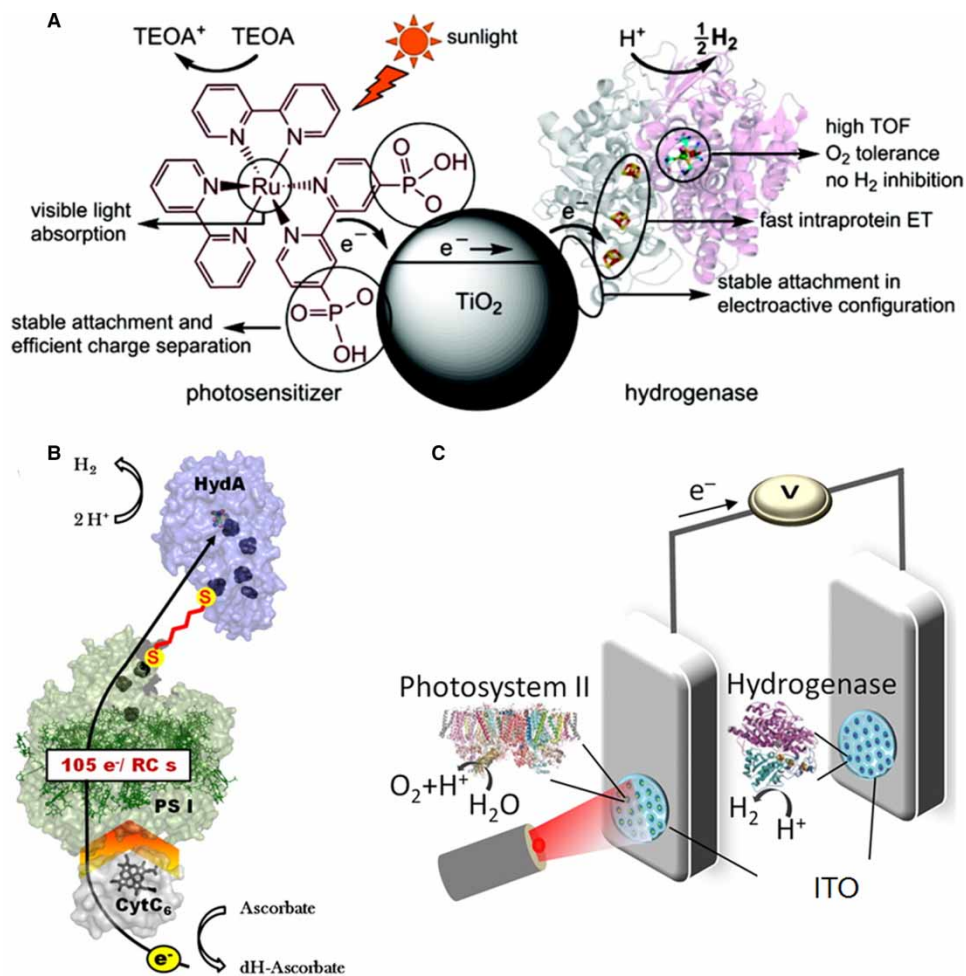

**Figure 12. Schematic representations of selected photobiocatalytic systems.**

(A) Photocatalytic H<sub>2</sub> production by *Desulfomicrobium baculatum* NiFeSe hydrogenase immobilised on TiO<sub>2</sub> nanoparticles that were dye-sensitised with an Ru complex, as reported by Reisner et al. TEOA was the sacrificial reductant. This hydrogenase was selected for characteristics such as its high TOF and fast intramolecular electron transfer (ET). Reproduced with permission from ref. [56]. (B) Photocatalytic H<sub>2</sub> production using *Synechococcus* sp. photosystem I (PS I) linked to *Clostridium acetobutylicum* FeFe hydrogenase (HydA) via a molecular dithiolate wire (red), reproduced with permission from ref. [62] by Lubner et al. Copyright 2011 National Academy of Sciences. (C) Photocatalytic water splitting by electronically interlinked *Thermosynechococcus elongatus* photosystem II and *D. baculatum* NiFeSe hydrogenase on separate ITO surfaces. Reproduced with permission from ref. [68] by Mersch et al.

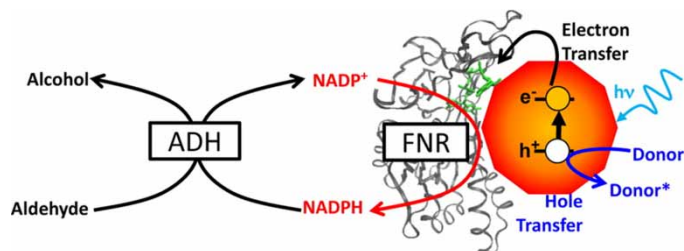

**Figure 13. Photobiocatalytic chemical synthesis.**

Light-driven reduction of NADP<sup>+</sup> to NADPH by ferredoxin NADP<sup>+</sup>-reductase on a CdSe quantum dot with AA (Donor), reduced to an ascorbyl radical (dHA, Donor\*), as sacrificial reductant is used with ADH in solution for NADPH-dependent aldehyde reduction as reported by Brown et al. Reproduced with permission from ref. [70].



recycling reduced cofactors, the system was limited by instability of the quantum dot–enzyme complex under illumination and is also likely to suffer from the known photoinstability of the reduced cofactors [69]. As is the case with conventional NAD(P)H recycling systems involving glucose, alcohol or formate dehydrogenases that act on sacrificial organic substrates, the requirement for excess ascorbic acid as reductant in this system also compromises the atom efficiency and product purity obtained in the biocatalytic process. A further challenge in the development of quantum dot or semiconductor particle biocatalytic systems is the uncertain ‘potential’ effectively applied at the particle surface under illumination, which could lead to non-selective redox chemistry involving the cofactor or the desired reagent or product.

## Conclusion

The present paper has reviewed the biological and technological applications of redox enzymes as modular catalysts for linking selective redox half-reactions, with a focus on connecting the  $H^+/H_2$  couple to other redox couples. Protein film electrochemistry is highlighted as a useful tool for understanding the individual characteristics of different redox enzymes, revealing important operational features such as catalytic bias and any overpotential requirement, which form critical background knowledge for selecting and designing enzyme pairs for artificially coupling on conductive particles. The ATR IR spectroscopic approach, demonstrated here for particles modified with hydrogenase and  $NAD^+$ -reductase, makes it possible to characterise the redox state of hydrogenase on particles during operational catalysis. This strategy provides an understanding of the redox environment imposed by the particle on the hydrogenase under different solution conditions, and reveals conditions which lead to inactivation or damage to the enzyme. It is thus possible to assemble a large body of knowledge about the characteristics of each enzyme and their suitability for coupled catalysis that informs selection of particular enzyme modules for specific tasks. The synthetic biochemistry approach we describe here for coupling enzyme pairs on conductive particles is likely to be particularly useful in reactions involving the  $H^+/H_2$  redox couple applied to  $H_2$ -driven synthesis of fine chemicals (or the reverse reaction, production of chemicals linked to generation of  $H_2$  as a bonus byproduct). Carbon particles provide an attractively cheap and readily available support for applications of redox enzymes. Whether the approaches we describe here can be extended beyond the arena of fine chemicals into the larger-scale production of commodity chemicals or biofuels will depend on how readily the metalloenzymes described in this review can be scaled for cheap, high-yield production, and this area remains largely unexplored.

## Abbreviations

AA, ascorbic acid; ADH, alcohol dehydrogenase; ATR, attenuated total reflectance; BP2000, Black Pearls 2000; CODH, carbon monoxide dehydrogenase; *ee*, enantiomeric excess; Hyd1, *E. coli* hydrogenase 1; Hyd2, *E. coli* hydrogenase 2; IR, infrared; ITO, indium tin oxide; MBH, membrane-bound hydrogenase;  $NAD(P)^+$ , nicotinamide adenine dinucleotide (phosphate) oxidised;  $NAD(P)H$ , nicotinamide adenine dinucleotide (phosphate) reduced;  $t_{1/2}$ , half-life; TEOA, triethanolamine; TOF, turnover frequency; TTN, total turnover number; TN, turnover number.

## Acknowledgements

We are grateful for financial support from the Biotechnology and Biological Sciences Research Council [BB/L009722/1] and the Innovate UK/BBSRC/EPSC Industrial Biotechnology Catalyst [EP/N013514/1]. A.H. and H.A.R. are grateful to the Royal Society of Chemistry for an Undergraduate Research Bursary. M.P. is supported by BBSRC iCASE studentship [BB/M017095/1] and Johnson Matthey Catalysis and Chiral Technologies (JM CCT). We are also grateful to Dr Beatriz Dominguez of JM CCT for providing samples of ADH 105 and ADH 101. Ms Elena Nomerotskaia is acknowledged for preparing samples of *E. coli* Hyd1 and Hyd2. We thank Janina Preissler and Lars Lauterbach for purifying HoxHYFU derivatives from *R. eutropha*.

## Competing Interests

The Authors declare that there are no competing interests associated with the manuscript.

## References

- 1 Cammack, R., Frey, M. and Robson, R. (2001) *Hydrogen as a Fuel: Learning from Nature*, Taylor and Francis, London
- 2 Vignais, P.M. and Billoud, B. (2007) Occurrence, classification, and biological function of hydrogenases: an overview. *Chem. Rev.* **107**, 4206–4272  
doi:10.1021/cr050196r

- 3 Horch, M., Lauterbach, L., Lenz, O., Hildebrandt, P. and Zebger, I. (2012) NAD(H)-coupled hydrogen cycling — structure-function relationships of bidirectional [NiFe] hydrogenases. *FEBS Lett.* **586**, 545–556 doi:10.1016/j.febslet.2011.10.010
- 4 McDowall, J.S., Murphy, B.J., Haumann, M., Palmer, T., Armstrong, F.A. and Sargent, F. (2014) Bacterial formate hydrogenlyase complex. *Proc. Natl Acad. Sci. U.S.A.* **111**, E3948–E3956 doi:10.1073/pnas.1407927111
- 5 Pinske, C. and Sargent, F. (2016) Exploring the directionality of *Escherichia coli* formate hydrogenlyase: a membrane-bound enzyme capable of fixing carbon dioxide to organic acid. *Microbiologyopen* **5**, 721–737 doi:10.1002/mbo3.365
- 6 Armstrong, F.A. and Hirst, J. (2011) Reversibility and efficiency in electrocatalytic energy conversion and lessons from enzymes. *Proc. Natl Acad. Sci. U.S.A.* **108**, 14049–14054 doi:10.1073/pnas.1103697108
- 7 Léger, C. and Bertrand, P. (2008) Direct electrochemistry of redox enzymes as a tool for mechanistic studies. *Chem. Rev.* **108**, 2379–2438 doi:10.1021/cr0680742
- 8 Lojou, E. (2011) Hydrogenases as catalysts for fuel cells: strategies for efficient immobilization at electrode interfaces. *Electrochim. Acta* **56**, 10385–10397 doi:10.1016/j.electacta.2011.03.002
- 9 Jeuken, L.J.C. (2016) In *Advances in Biochemical Engineering/Biotechnology* (Jeuken, L.J.C., ed.), Springer, Berlin, Heidelberg
- 10 Vincent, K.A., Parkin, A. and Armstrong, F.A. (2007) Investigating and exploiting the electrocatalytic properties of hydrogenases. *Chem. Rev.* **107**, 4366–4413 doi:10.1021/cr050191u
- 11 Evans, R.M. and Armstrong, F.A. (2014) Electrochemistry of Metalloproteins: Protein Film Electrochemistry for the Study of *E. coli* [NiFe]-Hydrogenase-1. In *Metalloproteins Methods and Protocols* (Fontecilla-Camps, J.C. and Nicolet, Y., eds), Humana Press, Springer Science+Business Media New York.
- 12 Flanagan, L.A. and Parkin, A. (2016) Electrochemical insights into the mechanism of NiFe membrane-bound hydrogenases. *Biochem. Soc. Trans.* **44**, 315–328 doi:10.1042/BST20150201
- 13 Ludwig, M., Cracknell, J.A., Vincent, K.A., Armstrong, F.A. and Lenz, O. (2009) Oxygen-tolerant H<sub>2</sub> oxidation by membrane-bound [NiFe] hydrogenases of *Ralstonia Species*: coping with low level H<sub>2</sub> in air. *J. Biol. Chem.* **284**, 465–477 doi:10.1074/jbc.M803676200
- 14 Vincent, K.A., Cracknell, J.A., Clark, J.R., Ludwig, M., Lenz, O., Friedrich, B. et al. (2006) Electricity from low-level H<sub>2</sub> in still air? An ultimate test for an oxygen tolerant hydrogenase. *Chem. Commun.* 5033–5035 doi:10.1039/b614272a
- 15 Vincent, K.A., Parkin, A., Lenz, O., Albracht, S.P.J., Fontecilla-Camps, J.C., Cammack, R. et al. (2005) Electrochemical definitions of O<sub>2</sub> sensitivity and oxidative inactivation in hydrogenases. *J. Am. Chem. Soc.* **127**, 18179–18189 doi:10.1021/ja055160v
- 16 Armstrong, F.A., Belsey, N.A., Cracknell, J.A., Goldet, G., Parkin, A., Reisner, E. et al. (2009) Dynamic electrochemical investigations of hydrogen oxidation and production by enzymes and implications for future technology. *Chem. Soc. Rev.* **38**, 36–51 doi:10.1039/B801144N
- 17 Pandelia, M.-E., Fourmond, V., Tron-Infossi, P., Lojou, E., Bertrand, P., Léger, C. et al. (2010) Membrane-bound hydrogenase I from the hyperthermophilic bacterium *Aquifex aeolicus*: enzyme activation, redox intermediates and oxygen tolerance. *J. Am. Chem. Soc.* **132**, 6991–7004 doi:10.1021/ja910838d
- 18 Lukey, M.J., Parkin, A., Roessler, M.M., Murphy, B.J., Harmer, J., Palmer, T. et al. (2010) How *Escherichia coli* is equipped to oxidize hydrogen under different redox conditions. *J. Biol. Chem.* **285**, 3928–3938 doi:10.1074/jbc.M109.067751
- 19 Evans, R.M., Brooke, E.J., Wehlin, S.A.M., Nomerotskaia, E., Sargent, F., Carr, S.B. et al. (2016) Mechanism of hydrogen activation by [NiFe] hydrogenases. *Nat. Chem. Biol.* **12**, 46–50 doi:10.1038/nchembio.1976
- 20 Liebgott, P.-P., Leroux, F., Burlat, B., Dementin, S., Baffert, C., Lautier, T. et al. (2010) Relating diffusion along the substrate tunnel and oxygen sensitivity in hydrogenase. *Nat. Chem. Biol.* **6**, 63–70 doi:10.1038/nchembio.276
- 21 Jones, A.K., Sillery, E., Albracht, S.P.J. and Armstrong, F.A. (2002) Direct comparison of the electrocatalytic oxidation of hydrogen by an enzyme and a platinum catalyst. *Chem. Commun.* 8, 866–867 doi:10.1039/b201337a
- 22 Shafaat, H.S., Rüdiger, O., Ogata, H. and Lubitz, W. (2013) [NiFe] hydrogenases: a common active site for hydrogen metabolism under diverse conditions. *Biochim. Biophys. Acta* **1827**, 986–1002 doi:10.1016/j.bbabi.2013.01.015
- 23 Parkin, A., Goldet, G., Cavazza, C., Fontecilla-Camps, J.C. and Armstrong, F.A. (2008) The difference a Se makes? Oxygen-tolerant hydrogen production by the [NiFeSe]-hydrogenase from *Desulfomicrobium baculatum*. *J. Am. Chem. Soc.* **130**, 13410–13416 doi:10.1021/ja803657d
- 24 Goldet, G., Brandmayr, C., Stripp, S.T., Happe, T., Cavazza, C., Fontecilla-Camps, J.C. et al. (2009) Electrochemical kinetic investigations of the reactions of [FeFe]-hydrogenases with carbon monoxide and oxygen: comparing the importance of gas tunnels and active-site electronic/redox effects. *J. Am. Chem. Soc.* **131**, 14979–14989 doi:10.1021/ja905388j
- 25 Adamska, A., Silakov, A., Lambert, C., Rüdiger, O., Happe, T., Reijerse, E. et al. (2012) Identification and characterization of the ‘super-reduced’ state of the H-cluster in [FeFe] hydrogenase: a new building block for the catalytic cycle? *Angew. Chem. Int. Ed.* **51**, 11458–11462 doi:10.1002/anie.201204800
- 26 Baffert, C., Sybirna, K., Ezanno, P., Lautier, T., Hajj, V., Meynial-Salles, I. et al. (2012) Covalent attachment of FeFe hydrogenases to carbon electrodes for direct electron transfer. *Anal. Chem.* **84**, 7999–8005 doi:10.1021/ac301812s
- 27 Elliott, S.J., Hoke, K.R., Heffron, K., Palak, M., Rothery, R.A., Weiner, J.H. et al. (2004) Voltammetric studies of the catalytic mechanism of the respiratory nitrate reductase from *Escherichia coli*: how nitrate reduction and inhibition depend on the oxidation state of the active site. *Biochemistry* **43**, 799–807 doi:10.1021/bi035869j
- 28 Bassegoda, A., Madden, C., Wakerley, D.W., Reisner, E. and Hirst, J. (2014) Reversible interconversion of CO<sub>2</sub> and formate by a molybdenum-containing formate dehydrogenase. *J. Am. Chem. Soc.* **136**, 15473–15476 doi:10.1021/ja508647u
- 29 Lauterbach, L., Idris, Z., Vincent, K.A. and Lenz, O. (2011) Catalytic properties of the isolated diaphorase fragment of the NAD<sup>+</sup>-reducing [NiFe]-hydrogenase from *Ralstonia eutropha*. *PLoS ONE* **6**, e25939 doi:10.1371/journal.pone.0025939
- 30 Zu, Y., Shannon, R.J. and Hirst, J. (2003) Reversible, electrochemical interconversion of NADH and NAD<sup>+</sup> by the catalytic (I<sub>2</sub>) subcomplex of mitochondrial NADH:ubiquinone oxidoreductase (complex I). *J. Am. Chem. Soc.* **125**, 6020–6021 doi:10.1021/ja0343961
- 31 Ali, I., Gill, A. and Omanovic, S. (2012) Direct electrochemical regeneration of the enzymatic cofactor 1,4-NADH employing nano-patterned glassy carbon/Pt and glassy carbon/Ni electrodes. *Chem. Eng. J.* **188**, 173–180 doi:10.1016/j.cej.2012.02.005
- 32 Ali, I., Khan, T. and Omanovic, S. (2014) Direct electrochemical regeneration of the cofactor NADH on bare Ti, Ni, Co and Cd electrodes: the influence of electrode potential and electrode material. *J. Mol. Catal. A: Chem.* **387**, 86–91 doi:10.1016/j.molcata.2014.02.029

- 33 Parkin, A., Seravalli, J., Vincent, K.A., Ragsdale, S.W. and Armstrong, F.A. (2007) Rapid and efficient electrocatalytic CO<sub>2</sub>/CO interconversions by *Carboxydotherrmus hydrogenoformans* CO dehydrogenase I on an electrode. *J. Am. Chem. Soc.* **129**, 10328–10329 doi:10.1021/ja073643o
- 34 Sucheta, A., Cammack, R., Weiner, J. and Armstrong, F.A. (1993) Reversible electrochemistry of fumarate reductase immobilized on an electrode surface. Direct voltammetric observations of redox centers and their participation in rapid catalytic electron transport. *Biochemistry* **32**, 5455–5465 doi:10.1021/bi00071a023
- 35 Tasca, F., Gorton, L., Harreither, W., Haltrich, D., Ludwig, R. and Nöll, G. (2008) Highly efficient and versatile anodes for biofuel cells based on cellobiose dehydrogenase from *Myriococcum thermophilum*. *J. Phys. Chem.* **112**, 13668–13673 doi:10.1021/jp805092m
- 36 Kamitaka, Y., Tsujimura, S., Setoyama, N., Kajino, T. and Kano, K. (2007) Fructose/dioxygen biofuel cell based on direct electron transfer-type bioelectrocatalysis. *Phys. Chem. Chem. Phys.* **9**, 1793–1801 doi:10.1039/b617650j
- 37 Kamitaka, Y., Tsujimura, S. and Kano, K. (2007) High current density bioelectrolysis of D-fructose at fructose dehydrogenase-adsorbed and Ketjen Black-modified electrodes without a mediator. *Chem. Lett.* **36**, 218–219 doi:10.1246/cl.2007.218
- 38 Soukharev, V., Mano, N. and Heller, A. (2004) A four-electron O<sub>2</sub>-electroreduction biocatalyst superior to platinum and a biofuel cell operating at 0.88 V. *J. Am. Chem. Soc.* **126**, 8368–8369 doi:10.1021/ja0475510
- 39 Blanford, C.F., Heath, R.S. and Armstrong, F.A. (2007) A stable electrode for high-potential, electrocatalytic O<sub>2</sub> reduction based on rational attachment of a blue copper oxidase to a graphite surface. *Chem. Commun.* **17**, 1710–1712 doi:10.1039/b703114a
- 40 dos Santos, L., Climent, V., Blanford, C.F. and Armstrong, F.A. (2010) Mechanistic studies of the ‘blue’ Cu enzyme, bilirubin oxidase, as a highly efficient electrocatalyst for the oxygen reduction reaction. *Phys. Chem. Chem. Phys.* **12**, 13962 doi:10.1039/c0cp00018c
- 41 Lauterbach, L., Liu, J., Horch, M., Hummel, P., Schwarze, A., Haumann, M. et al. (2011) The hydrogenase subcomplex of the NAD<sup>+</sup>-reducing [NiFe] hydrogenase from *Ralstonia eutropha* — insights into catalysis and redox interconversions. *Eur. J. Inorg. Chem.* **2011**, 1067–1079 doi:10.1002/ejic.201001053
- 42 Vincent, K.A., Li, X., Blanford, C.F., Belsey, N.A., Weiner, J.H. and Armstrong, F.A. (2007) Enzymatic catalysis on conducting graphite particles. *Nat. Chem. Biol.* **3**, 761–762 doi:10.1038/nchembio.2007.47
- 43 Lazarus, O., Woolerton, T.W., Parkin, A., Lukey, M.J., Reisner, E., Seravalli, J. et al. (2009) Water–gas shift reaction catalyzed by redox enzymes on conducting graphite platelets. *J. Am. Chem. Soc.* **131**, 14154–14155 doi:10.1021/ja905797w
- 44 Reeve, H.A., Lauterbach, L., Ash, P.A., Lenz, O. and Vincent, K.A. (2012) A modular system for regeneration of NAD cofactors using graphite particles modified with hydrogenase and diaphorase moieties. *Chem. Commun.* **48**, 1589–1591 doi:10.1039/C1CC14826E
- 45 Reeve, H.A., Lauterbach, L., Lenz, O. and Vincent, K.A. (2015) Enzyme-modified particles for selective biocatalytic hydrogenation by hydrogen-Driven NADH recycling. *ChemCatChem* **7**, 3480–3487 doi:10.1002/cctc.201500766
- 46 Burgdorf, T., De Lacey, A.L. and Friedrich, B. (2002) Functional analysis by site-directed mutagenesis of the NAD<sup>+</sup>-reducing hydrogenase from *Ralstonia eutropha*. *J. Bacteriol.* **184**, 6280–6288 doi:10.1128/JB.184.22.6280-6288.2002
- 47 Wang, X. and Yiu, H.H.P. (2016) Heterogeneous catalysis mediated cofactor NADH regeneration for enzymatic reduction. *ACS Catal.* **6**, 1880–1886 doi:10.1021/acscatal.5b02820
- 48 De Lacey, A.L., Fernández, V.M., Rousset, M. and Cammack, R. (2007) Activation and inactivation of hydrogenase function and the catalytic cycle: spectroelectrochemical studies. *Chem. Rev.* **107**, 4304–4330 doi:10.1021/cr0501947
- 49 Hidalgo, R., Ash, P.A., Healy, A.J. and Vincent, K.A. (2015) Infrared spectroscopy during electrocatalytic turnover reveals the Ni-L active site state during H<sub>2</sub> oxidation by a NiFe hydrogenase. *Angew. Chem. Int. Ed.* **54**, 7110–7113 doi:10.1002/anie.201502338
- 50 Greene, B.L., Wu, C.-H., McTernan, P.M., Adams, M.W.W. and Dyer, R.B. (2015) Proton-coupled electron transfer dynamics in the catalytic mechanism of a [NiFe]-hydrogenase. *J. Am. Chem. Soc.* **137**, 4558–4566 doi:10.1021/jacs.5b01791
- 51 Ash, P.A., Reeve, H.A., Quinson, J., Hidalgo, R., Zhu, T., McPherson, I.J. et al. (2016) Synchrotron-based infrared microanalysis of biological redox processes under electrochemical control. *Anal. Chem.* **88**, 6666–6671 doi:10.1021/acs.analchem.6b00898
- 52 Salewski, J., Batista, A.P., Sena, F.V., Millo, D., Zebger, I., Pereira, M.M. et al. (2016) Substrate–protein interactions of type II NADH:quinone oxidoreductase from *Escherichia coli*. *Biochemistry* **55**, 2722–2734 doi:10.1021/acs.biochem.6b00070
- 53 Payen, B., Segui, M., Monsan, P., Schneider, K., Friedrich, C.G. and Schlegel, H.G. (1983) Use of cytoplasmic hydrogenase from *Alcaligenes eutrophus* for NADH regeneration. *Biotechnol. Lett.* **5**, 463–468 doi:10.1007/BF00132229
- 54 Mertens, R., Greiner, L., van den Ban, E.C.D., Haaker, H. and Liese, A. (2003) Practical applications of hydrogenase I from *Pyrococcus furiosus* for NADPH generation and regeneration. *J. Mol. Catal. B: Enzym.* **24–25**, 39–52 doi:10.1016/S1381-1177(03)00071-7
- 55 Ratzka, J., Lauterbach, L., Lenz, O. and Ansoorge-Schumacher, M.B. (2011) Systematic evaluation of the dihydrogen-oxidising and NAD<sup>+</sup>-reducing soluble [NiFe]-hydrogenase from *Ralstonia eutropha* H16 as a cofactor regeneration catalyst. *Biocatal. Biotransform.* **29**, 246–252 doi:10.3109/10242422.2011.615393
- 56 Reisner, E., Powell, D.J., Cavazza, C., Fontecilla-Camps, J.C. and Armstrong, F.A. (2009) Visible light-driven H<sub>2</sub> production by hydrogenases attached to dye-sensitized TiO<sub>2</sub> nanoparticles. *J. Am. Chem. Soc.* **131**, 18457–18466 doi:10.1021/ja907923r
- 57 Brown, K.A., Dayal, S., Ai, X., Rumbles, G. and King, P.W. (2010) Controlled assembly of hydrogenase-CdTe nanocrystal hybrids for solar hydrogen production. *J. Am. Chem. Soc.* **132**, 9672–9680 doi:10.1021/ja101031r
- 58 Brown, K.A., Wilker, M.B., Boehm, M., Dukovic, G. and King, P.W. (2012) Characterization of photochemical processes for H<sub>2</sub> production by CdS nanorod–[FeFe] hydrogenase complexes. *J. Am. Chem. Soc.* **134**, 5627–5636 doi:10.1021/ja2116348
- 59 Woolerton, T.W., Sheard, S., Reisner, E., Pierce, E., Ragsdale, S.W. and Armstrong, F.A. (2010) Efficient and clean photoreduction of CO<sub>2</sub> to CO by enzyme-modified TiO<sub>2</sub> nanoparticles using visible light. *J. Am. Chem. Soc.* **132**, 2132–2133 doi:10.1021/ja910091z
- 60 Woolerton, T.W., Sheard, S., Pierce, E., Ragsdale, S.W. and Armstrong, F.A. (2011) CO<sub>2</sub> photoreduction at enzyme-modified metal oxide nanoparticles. *Energy Environ. Sci.* **4**, 2393 doi:10.1039/c0ee00780c
- 61 Brown, K.A., Harris, D.F., Wilker, M.B., Rasmussen, A., Khadka, N., Hamby, H. et al. (2016) Light-driven dinitrogen reduction catalyzed by a CdS: nitrogenase MoFe protein biohybrid. *Science* **352**, 448–450 doi:10.1126/science.1242091
- 62 Lubner, C.E., Applegate, A.M., Knörzer, P., Ganago, A., Bryant, D.A., Happe, T. et al. (2011) Solar hydrogen-producing bionanodevice outperforms natural photosynthesis. *Proc. Natl Acad. Sci. U.S.A.* **108**, 20988–20991 doi:10.1073/pnas.1114660108

- 63 Lubner, C.E., Grimme, R., Bryant, D.A. and Golbeck, J.H. (2010) Wiring photosystem I for direct solar hydrogen production. *Biochemistry* **49**, 404–414 doi:10.1021/bi901704v
- 64 Lubner, C.E., Knörzer, P., Silva, P.J.N., Vincent, K.A., Happe, T., Bryant, D.A. et al. (2010) Wiring an [FeFe]-hydrogenase with photosystem I for light-induced hydrogen production. *Biochemistry* **49**, 10264–10266 doi:10.1021/bi1016167
- 65 Schwarze, A., Kopczak, M.J., Rögner, M. and Lenz, O. (2010) Requirements for construction of a functional hybrid complex of photosystem I and [NiFe]-hydrogenase. *Appl. Environ. Microbiol.* **76**, 2641–2651 doi:10.1128/AEM.02700-09
- 66 Ihara, M., Nishihara, H., Yoon, K.-S., Lenz, O., Friedrich, B., Nakamoto, H. et al. (2006) Light-driven hydrogen production by a hybrid complex of a [NiFe]-hydrogenase and the cyanobacterial photosystem I. *Photochem. Photobiol.* **82**, 676–682 doi:10.1562/2006-01-16-RA-778
- 67 Krassen, H., Schwarze, A., Friedrich, B., Ataka, K., Lenz, O. and Heberle, J. (2009) Photosynthetic hydrogen production by a hybrid complex of photosystem I and [NiFe]-hydrogenase. *ACS Nano* **3**, 4055–4061 doi:10.1021/nn900748j
- 68 Mersch, D., Lee, C.-Y., Zhang, J.Z., Brinkert, K., Fontecilla-Camps, J.C., Rutherford, A.W. et al. (2015) Wiring of photosystem II to hydrogenase for photoelectrochemical water splitting. *J. Am. Chem. Soc.* **137**, 8541–8549 doi:10.1021/jacs.5b03737
- 69 Umrikhina, A.V., Luganskaya, A.N. and Krasnovsky, A.A. (1990) ESR signals of NADH and NADPH under illumination. *FEBS Letters* **260**, 294–296 doi:10.1016/0014-5793(90)80127-5
- 70 Brown, K.A., Wilker, M.B., Boehm, M., Hamby, H., Dukovic, G. and King, P.W. (2016) Photocatalytic regeneration of nicotinamide cofactors by quantum dot–enzyme biohybrid complexes. *ACS Catal.* **6**, 2201–2204 doi:10.1021/acscatal.5b02850
